# Supplementary material
Source: ML conference proceedings conference paper supplement (https://proceedings.mlr.press/v32/samdani14.html)
Supplement: Supplementary file 1 [file samdani14-supp.pdf]

---

# Supplement: A Discriminative Latent Variable Model for Online Clustering

---

Rajhans Samdani, Google Research  
 Kai-Wei Chang, University of Illinois  
 Dan Roth, University of Illinois

RAJHANS@GOOGLE.COM  
 KCHANG10@ILLINOIS.EDU  
 DANR@ILLINOIS.EDU

This supplement provides the proof that the probability of clustering as per the left-linking tree model is the same as the probability of a clustering as per the L<sup>3</sup>M model and also provides the results with randomized ordering of items discussed in Section 5.4.

## 1. Proof. of Theorem 1

The main paper (Eq. 4) presents the probability of a clustering  $\mathcal{C}$  as per the L<sup>3</sup>M model as:

$$Pr[\mathcal{C} \leftarrow i; d, \mathbf{w}] = \sum_{0 \leq j < i} Pr[j \leftarrow i; d, \mathbf{w}] \mathcal{C}(i, j) = \frac{Z_i(\mathcal{C}; d, \mathbf{w}, \gamma)}{Z_i(d, \mathbf{w}, \gamma)}, \quad (1)$$

where  $Z(d, \mathbf{w}, \gamma) = \prod_{i=1}^{m_d} Z_i(d, \mathbf{w}, \gamma)$  is the partition function and  $Z(\mathcal{C}; d, \mathbf{w}, \gamma) = \prod_{i=1}^{m_d} Z_i(\mathcal{C}; d, \mathbf{w}, \gamma)$ .

For the left-linking tree model, the probability of a left-linking tree  $\mathbf{z}$  is represented as

$$Pr[\mathbf{z}; d, \mathbf{w}] = \frac{1}{T(d, w, \gamma)} \exp \left( \frac{1}{\gamma} \left( \sum_{(i,j) \in \mathbf{z}} \mathbf{w} \cdot \phi(i, j) \right) \right),$$

where  $T(d, w, \gamma) = \sum_{\mathbf{z} \in \mathcal{Z}_d} \exp \left( \frac{1}{\gamma} \left( \sum_{(i,j) \in \mathbf{z}} \mathbf{w} \cdot \phi(i, j) \right) \right)$  is the left-linking tree partition function. The probability of a clustering  $\mathcal{C}$  as per the left-linking tree model is expressed (Eq. 5 in the main paper) as the sum of the probabilities of all the left-linking trees consistent with  $\mathcal{C}$ :

$$\begin{aligned} Pr'[\mathcal{C}; d, \mathbf{w}] &= \sum_{\mathbf{z} \in \mathcal{Z}_d^c} Pr[\mathbf{z}; d, \mathbf{w}] \\ &= \frac{1}{T(d, w, \gamma)} \sum_{\mathbf{z} \in \mathcal{Z}_d^c} \exp \left( \frac{1}{\gamma} \left( \sum_{(i,j) \in \mathbf{z}} \mathbf{w} \cdot \phi(i, j) \right) \right). \end{aligned} \quad (2)$$

Now, following is the theorem stated in the paper.

**Theorem 1.** *The probability of a clustering as per the left-linking tree model, expressed in Eq. (2), is the same as probability of clustering for L<sup>3</sup>M as expressed in Eq. (1), i.e.  $Pr'[\mathcal{C}; d, \mathbf{w}] = Pr[\mathcal{C}; d, \mathbf{w}]$ .*

*Proof.* We will focus on the proof with  $\gamma > 0$ . As the functions in Eq. (1) and Eq. (2) are bounded and continuous, we

shall see that the same result will hold for  $\gamma \rightarrow 0$ .

First we will prove that the two partitions functions are the same:  $T(d, \mathbf{w}, \gamma) = Z(d, \mathbf{w}, \gamma)$ . The proof for the equivalence of the numerators for Eq. (1) and Eq. (2) will be analogous.

Below, we prove  $T(d, \mathbf{w}, \gamma) = Z(d, \mathbf{w}, \gamma)$  by induction on the number of items,  $m_d$ . We abuse the notation and write  $Z(n, \mathbf{w}, \gamma)$  as the partition function for L<sup>3</sup>M when considering only the first  $n$  items. We use the notation  $T(n, \mathbf{w}, \gamma)$  similarly.

**Base case:**  $m_d = 1$ . With just one actual item and one dummy item 0,  $Z(1, \mathbf{w}, \gamma) = \exp(\frac{1}{\gamma}(\mathbf{w} \cdot \phi(1, 0))) = \exp(0) = 1$ . Also there is only one left-linking tree possible (with item 0 as the root and 1 as its only child), and so  $T(1, \mathbf{w}, \gamma) = \exp(\frac{1}{\gamma}(\mathbf{w} \cdot \phi(1, 0))) = 1$ . Thus the hypothesis holds for  $m_d = 1$ .

Now, lets assume that the induction hypothesis holds for  $m_d = n - 1$  for  $n \geq 2$ . That is we have

$$\begin{aligned} T(n-1, \mathbf{w}, \gamma) &= Z(n-1, \mathbf{w}, \gamma) \\ \Rightarrow \sum_{\mathbf{z} \in \mathcal{Z}^{n-1}} \exp \left( \frac{1}{\gamma} \left( \sum_{(i,j) \in \mathbf{z}} \mathbf{w} \cdot \phi(i, j) \right) \right) \\ &= \prod_{i=1}^{n-1} \left( \sum_{0 \leq j < i} \exp \left( \frac{1}{\gamma} (\mathbf{w} \cdot \phi(i, j)) \right) \right), \end{aligned} \quad (3)$$

where  $\mathcal{Z}^{n-1}$  is the set of left-linking trees over  $n-1$  items.

Our goal is to prove the same holds for  $m_d = n$ . Consider the expression for  $T(n, \mathbf{w}, \gamma)$ :

$$\sum_{\mathbf{z} \in \mathcal{Z}^n} \exp \left( \frac{1}{\gamma} \left( \sum_{(i,j) \in \mathbf{z}} \mathbf{w} \cdot \phi(i, j) \right) \right), \quad (4)$$

where  $\mathcal{Z}^n$  is the set of left-linking trees over  $n$  items. Notice that for a left-linking tree, the edge connecting item  $n$  to its parent is independent of the remaining edges. In other words,  $\mathbf{z}$  is a valid left-linking tree over  $n$  items iff by removing the item  $n$  and its associated edge, we get a valid left-linking tree over  $n-1$  items. Thus we can construct  $\mathcal{Z}^n$ , the set of all left-linking trees over  $n$  items by taking  $\mathcal{Z}^{n-1}$ , the set of all left-linking trees over  $n-1$

| Task →                                  | ACE Coreference |                |       |       | Author Clustering             | Topic Clustering w/ one pass |        |
|-----------------------------------------|-----------------|----------------|-------|-------|-------------------------------|------------------------------|--------|
| Technique                               | MUC             | B <sup>3</sup> | CEAF  | AVG   | Variation of Information (VI) |                              |        |
| Sum-Link                                | 69.35           | 77.3           | 73.54 | 73.40 | 134.03                        | 259.57                       | 263.62 |
| Bin-Left-Link                           | 72.62           | 76.84          | 74.89 | 74.78 | 133.62                        | 252.69                       | 257.69 |
| <b>L<sup>3</sup>M</b> ( $\gamma = 0$ )  | 75.18           | 78.66          | 76.02 | 76.62 | 133.66                        | 252.17                       | 254.64 |
| <b>L<sup>3</sup>M</b> (tuned $\gamma$ ) | 75.47           | 79.1           | 76.16 | 76.91 | 132.81                        | 245.33                       | 249.09 |

Table 1: Results with randomized ordering of items on coreference resolution for the ACE data and on author-based and discussion topic-based clustering for Forum data. All the results are scaled by 100. Compare these results to the non-randomized results in the main paper (Tables 1 and 2b in the main paper.) The results for coreference resolution and topic clustering get significantly worse after randomization, while the effect is not so pronounced for author-based clustering.

items, and connecting item  $n$  to any of the previous  $n$  items  $(0, \dots, n-1)$  i.e.  $\mathcal{Z}^n = \{\mathbf{z} \cup \{(n, j)\} | \mathbf{z} \in \mathcal{Z}^{n-1}, j \in \{0, \dots, n-1\}\}$ . This implies that we can re-write the expression in Eq. (4) as

$$\begin{aligned}
 & \sum_{0 \leq j < n, \mathbf{z}' \in \mathcal{Z}^{n-1}} \left( \exp \left( \frac{1}{\gamma} (\mathbf{w} \cdot \phi(n, j)) \right) \right. \\
 & \times \left. \exp \left( \frac{1}{\gamma} \left( \sum_{(i,k) \in \mathbf{z}'} \mathbf{w} \cdot \phi(i, k) \right) \right) \right) \\
 & = \left( \sum_{0 \leq j < n} \exp \left( \frac{1}{\gamma} (\mathbf{w} \cdot \phi(n, j)) \right) \right) \\
 & \times \left( \sum_{\mathbf{z} \in \mathcal{Z}^{n-1}} \exp \left( \frac{1}{\gamma} \left( \sum_{(i,k) \in \mathbf{z}'} \mathbf{w} \cdot \phi(i, k) \right) \right) \right) \\
 & = \left( \sum_{0 \leq j < n} \exp \left( \frac{1}{\gamma} (\mathbf{w} \cdot \phi(n, j)) \right) \right) \\
 & \times \left( \prod_{i=1}^{n-1} \left( \sum_{0 \leq k < i} \exp \left( \frac{1}{\gamma} (\mathbf{w} \cdot \phi(i, k)) \right) \right) \right) \quad (\text{by Eq. (3)}) \\
 & = \prod_{i=1}^n \left( \sum_{0 \leq j < i} \exp \left( \frac{1}{\gamma} (\mathbf{w} \cdot \phi(i, j)) \right) \right),
 \end{aligned}$$

which is the same as  $Z(n, \mathbf{w}, \gamma)$ . Hence our proof is complete and the two partition functions are the same.

One can analogously prove that the numerator of Equations (1) and (2) are the same i.e.

$$\begin{aligned}
 Z(\mathcal{C}; d, \mathbf{w}, \gamma) &= \prod_{i=1}^{m_d} \left( \sum_{0 \leq j < i} \exp \left( \frac{1}{\gamma} (\mathbf{w} \cdot \phi(i, j)) \right) \mathcal{C}(i, j) \right) \\
 &= \sum_{\mathbf{z} \in \mathcal{Z}_d^c} \exp \left( \frac{1}{\gamma} \left( \sum_{(i,j) \in \mathbf{z}} \mathbf{w} \cdot \phi(i, j) \right) \right).
 \end{aligned}$$

This implies that  $Pr'[\mathcal{C}; d, \mathbf{w}] = Pr[\mathcal{C}; d, \mathbf{w}]$  for  $\gamma > 0$ .

Now, as  $\gamma \rightarrow 0$ , the function in Eq. (1) converge to a Kronecker delta function as explained in the main paper. Also, for  $\gamma \rightarrow 0$ , the function in Eq. (2) converges to a Kronecker delta function which is 1 for the clustering consistent with the maximum weight left-linking tree, and 0 else where. As the two probability functions are always bounded and continuous for  $\gamma > 0$ , the equivalence of the two probabilities holds as  $\gamma \rightarrow 0$ , where or  $\gamma = 0$ , it is assumed that

the functions in Eq. (1) and (2) are replaced by appropriate Kronecker delta functions.  $\square$

## 2. Results with Randomized Ordering

Table 1 presents results for coreference clustering for ACE data and for document clustering based on authors and topics. Notice that when compared with results in Tables 1 and 2b, the performance declines due to disruption in the natural ordering of items. The deterioration is significant for coreference clustering (approx 3 points decrease in average of MUC, B<sup>3</sup>, and CEAF) and for topic-based clustering (approx 10 points **increase** in VI), but not so significant for author-based clustering (< 1 point increase in VI.)
